# Supplementary material for: Assessment of patient safety culture in primary health care in Muscat, Oman: a questionnaire -based survey
Source: PubMed Central journal article supplement (PMC6449986; doi:10.1186/s12875-019-0937-4), 2019-04-05
Supplement: 12875_2019_937_MOESM2_ESM.pdf [file 12875_2019_937_MOESM2_ESM.pdf]

*Sultanate of Oman*  
*Ministry of Health*  
*Directorate General of Planning*  
*and Studies*

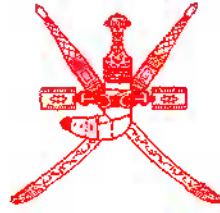

سلطنة عمان  
وزارة الصحة  
المديرية العامة للتخطيط  
والدراسات

Ref. : MH/DGP/R&S/PROPOSAL\_APPROVED/3/2016

Date : 2.2.2016

الرقم :

التاريخ :

الموافق :

Muna Habib Al Lawati  
Principal Investigator

Study Title: "Patient safety culture assessment in primary care in Muscat, Oman".

**After compliments**

We are pleased to inform you that your research proposal "Patient safety culture assessment in primary care in Muscat, Oman" has been approved by Research and Ethical Review & Approve Committee, Ministry of Health.

Regards,

**Dr. Ahmed Mohamed Al Qasmi**  
**Director General of Planning and Studies**  
**Chairman, Research and Ethical Review and Approve Committee**  
**Ministry of Health, Sultanate of Oman.**

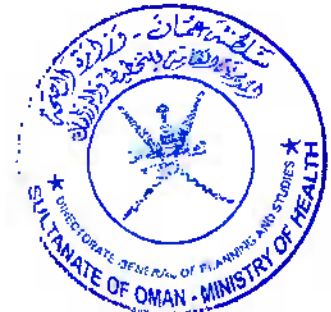

Cc  
Day file
